# Supplementary material
Source: Springer Nature journal article supplement (https://www.springermedizin.de/resource/supplementary/12881_2013_1123_MOESM1_ESM.pdf/9452028)

**A** COPD patients with XRCC3 (ThrMet+MetMet)

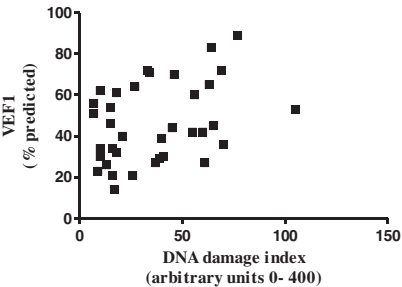

**B** COPD patients with XRCC1 (ArgGln+GlnGln)

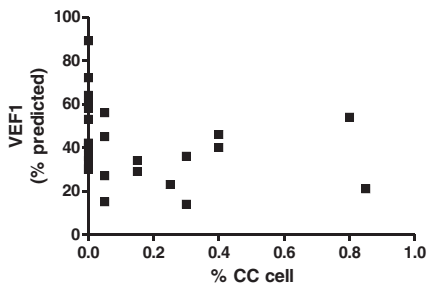

**C** COPD patients with XRCC1 (ArgGln+GlnGln)

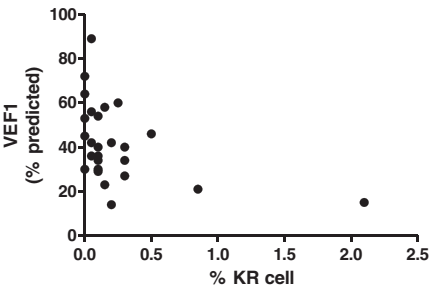

Supplement: MOESM1 [file 9452028]
